# Supplementary material for: A Comprehensive Overview of the Cyclodipeptide Synthase Family Enriched with the Characterization of 32 New Enzymes
Source: Front Microbiol. 2018 Feb 12;9:46. doi: 10.3389/fmicb.2018.00046 (PMC5816076; doi:10.3389/fmicb.2018.00046)
Supplement: Supplemental Data Set 2 — MS2 and MS3 spectra of cyclodipeptides (standards and newly identified). [file DataSheet2.xlsx]

## Sheet: Legend
	Supplemental Data Set 2. MS2 and MS3 spectra of cyclodipeptides (standards and newly identified)
	Data tab are named according to the amino acid common to the cyclodipeptides of the sheet. The number indicates the number of different cyclodipeptides for each group.
	- fragments characteristic of the common amino acid are colored in red, fragments related to typical neutral loss are in green.
	- fragments characteristic of the diketopiperazine ring fragmentation are in orange (light orange if the parent ion result from previous fragmentation of the initial product)
	- fragments differentiating Ile and Leu are in blue
	Each data sheet contains:
	- the name of the cylodipeptide
	- the m/z value of the [M+H]+ species
	- the MS/MS product ions and their relative abundancy (%). When appropriate, the MS3 data of the main fragment obtained in MS2 is given. The ion analyzed in MS3 is in bold
	- Reference indicates either supplier of the cyclodipeptide characterized, or the paper describing the obtention of the molecule. "Chemical synthesis" refers to products avaiable in the lab and synthesized according to Jeedigunta et al
	(Tetrahedron, 2000, 56, 3303-3307).

## Sheet: cAX - 12
Compound	m/z	Fragment ions (%)	Reference	calibration curve (y: area UV214; x: species amount in nmol)
cAA	143	70.6 (3.2); 87.4 (3.4); 97.3 (1.4); 98.2 (100); 115.1 (34.3); 126 (1.5);	Bachem - G1655	y=35.20+393.16x
cAC	175	76.3 (1.2); 83.3 (9.4); 85.3 (1.8); 102.1 (34.7); 104.1 (1.5); 111.1 (26.8); 112 (3.3); 128.9 (2.5); 129.9 (100); 146.9 (66.6); 156.9 (3.8); 157.9 (33.2)	Jacques et al (2015) Nat Chem Biol 11, 721-727
cAE	201	155 (4.5); 182.9 (100);	Bachem - G4775	y=54.80+473.78x
	183	84.3 (2.7); 110.1 (5.7); 127.1 (17.2); 155 (100);
cAF	219	103 (0.4); 119.9 (100); 130.9 (0.4); 145.8 (2.3); 147.8 (0.4); 173.8 (6.4); 189.9 (0.7); 190.8 (60.7);	Jacques et al (2015) Nat Chem Biol 11, 721-727	y=-12.64+715.98x
cAG	129	55.5 (0.8); 56.5 (1.4); 72.5 (7.6); 73.5 (9.2); 83.4 (0.9); 84.3 (31.9); 100.1 (0.9); 101.2 (100); 111.2 (0.9); 112.1 (11.1);	Bachem - G1660
cAI	185	69.4 (1.5); 86.2 (100); 89.2 (0.7); 112.1 (6.4); 113.9 (1.2); 128.9 (0.9); 139.9 (35.4); 156.9 (41.3);	Xing et al (2008) Rapid Commun. Mass Spectrom. 22, 1415–1422 Stark & Hohman (2005) J. Agric. Food Chem. 53, 7222–7231 This study
cAL	185	84.4 (0.9); 86.4 (53.7); 101.2 (5.1); 112.2 (6.1); 114.1 (1.7); 129.1 (6); 140 (100); 157.1 (24.2);	Sigma - C9038	y=-3.04+182.25x
cAM	203	126.9 (0.9); 154.8 (100);	Jacques et al (2015) Nat Chem Biol 11, 721-727
	155	71.3 (0.4); 74.4 (0.3); 82.2 (0.9); 84.2 (2.4); 86.3 (0.6); 97 (1.3); 99.1 (20.8); 109 (1); 110 (7.5); 126.9 (100);
cAP	169	70.4 (100); 72.4 (0.5); 96.2 (4.9); 98.1 (3.3); 113.1 (5.5); 124 (3.5); 125 (4.4); 141 (33.4); 151.9 (9.4);	Jacques et al (2015) Nat Chem Biol 11, 721-727
cAV	171	44 (15.3), 72 (100), 86 (7.2), 98 (39.2), 100 (15.3), 126 (23.8), 143 (11.8)	Chen et al (2004) Eur. Food Res. Technol. 218, 589–597 Stark & Hohman (2005) J. Agric. Food Chem. 53, 7222–7231
cAW	258	89.1 (0.3); 116.9 (0.8); 118 (0.3); 129.9 (100); 131.9 (14.9); 169.8 (4.7); 186.9 (0.2); 212.9 (0.3); 229.8 (0.2); 240.9 (1.1);	Seguin et al. (2009) Chem Biol 18, 1362-1368
cAY	235	91.2 (1.1); 107.1 (20.8); 119 (0.7); 129 (10.7); 136 (100); 147 (3.6); 162 (2.2); 164 (2.8); 179 (1.5); 189.9 (4.5); 207 (73.6); 218 (1.2);	Gondry et al (2009) Nat Chem Biol 5, 414-420	y=-8.39+790.44x

## Sheet: cEX 9 cQX 4
Compound	m/z	Fragment ions (%)	Reference	calibration curve (y: area UV214; x: species amount in nmol)
cEA	201	155 (4.5); 182.9 (100);	Bachem - G4775	y=54.80+473.78x
	183	84.3 (2.7); 110.1 (5.7); 127.1 (17.2); 155 (100);
cEC	233	214.8 (100)	Jacques et al (2015) Nat Chem Biol 11, 721-727
	215	76.3 (6.9); 84.3 (4.8); 122.9 (1.8); 125 (5.9); 141.9 (55.9); 152.9 (6.7); 168.9 (19.2); 169.9 (100); 180.9 (14.7); 186.9 (93.6); 196.8 (27.9); 197.9 (5.9)
cEF	277	120.2 (1.4); 186 (0.5); 231.1 (19.8); 259 (100); 261.4 (0.5);	Jacques et al (2015) Nat Chem Biol 11, 721-727
	259	84.3 (0.7); 103.1 (1.3); 120.1 (27.6); 186 (10.8); 203 (2.4); 231 (100);
cQF	276	120.2 (0.6); 231.1 (3.8); 259 (100);	Chemical synthesis
	259	84.3 (1.1); 103.2 (1.1); 120.1 (36.3); 148 (1); 186 (12.8); 203 (3.5); 213 (3.1); 213.9 (1.4); 231 (100); 241 (5);
cEG	187	113 (0.7); 168.8 (100);	Bachem - G4290	y=30.71+389.29x (y between 0 and 7000)
	169	84.2 (100); 96.1 (14.3); 113 (98.2); 123.9 (4.8); 140.9 (97.9); 150.9 (2.6);
cQG	186	155.9 (1.6); 168.9 (100)	Bachem - G3945
	169	84.2 (100); 96.1 (14.9); 113.1 (79.7); 124 (4.2); 140.9 (87.8); 151 (1.5)
cEH	267	110 (11,1); 165,8 (4); 175,8 (5,4); 203,8 (11,5); 220,9 (44,3); 230,9 (0,9); 231,9 (0,7); 248,9 (100);	This study
	249	93,1 (1); 110 (25,8); 137,9 (0,6); 164,7 (0,6); 165,8 (5,6); 175,8 (28,2); 202,9 (2,2); 203,8 (28,8); 220,8 (100); 230,8 (5,3);
cEL	243	86.3 (0.6); 129 (1.5); 141 (1.1); 197 (12.8); 224.9 (100);	Jacques et al (2015) Nat Chem Biol 11, 721-727
	225	84.3 (5.6); 86.3 (13); 113.1 (5.9); 129 (29.1); 140.9 (27.8); 152 (0.5); 196.9 (100);
cQL	242	197 (2.2); 224.9(100)	Jacques et al (2015) Nat Chem Biol 11, 721-727
	225	84.3 (6.1); 86.3 (17.7); 113.1 (6.9); 114 (1.2); 129 (28); 141 (27); 196.9 (100); 206.9 (3)
cEM	261	104.1 (0.8); 123.9 (0.4); 167 (83); 195 (23.6); 213 (76.6); 215 (81.8); 241.6 (0.8); 243 (100);	Jacques et al (2015) Nat Chem Biol 11, 721-727
	243	104.1 (1.8); 166.9 (100); 186.9 (0.5); 194.9 (32.7); 213.2 (0.9); 214.9 (53.6)
cES	217	198.9 (100)	Jacques et al (2015) Nat Chem Biol 11, 721-727
	199	60.4 (1.5); 84.3 (3.1); 98.1 (5.2); 125 (4.5); 125.9 (100); 140.9 (2.3); 150.9 (1.3); 152.9 (6); 153.9 (27.9); 168.9 (49.9); 170.9 (48.2); 180.9 (8.4)
cEW	316	129.9 (11); 131.9 (0.6); 269.9 (8.7); 280 (6.1); 297.9 (100);	This study
	298	117.9 (0.9); 129.9 (6.6); 131.9 (12.5); 138.9 (0.8); 141.8 (0.7); 152.9 (2.1); 169.8 (2); 224.9 (1.5); 251.9 (2.1); 252.9 (4.8); 270 (100); 279.9 (26.9);
cQW	315	129.9 (32.7); 162.9 (0.5); 269.9 (1.6); 280 (17.6); 295.7 (1.1); 296.3 (2.3); 297.1 (4.2); 298 (100);	This study
	298	117.9 (1.1); 124.9 (2.6); 129.9 (44.4); 131.9 (12.6); 138.8 (1.5); 141.9 (0.9); 152.9 (5); 158.9 (0.8); 169 (1.5); 169.9 (1); 225.2 (2.3); 251.9 (1.7); 252.9 (7.2); 269.9 (100); 279.9 (38.9);

## Sheet: cFX - 19
Compound	m/z	Fragment ions (%)	Reference	calibration curve (y: area UV214; x: species amount in nmol)
cFA	219	103 (0.4); 119.9 (100); 130.9 (0.4); 145.8 (2.3); 147.8 (0.4); 173.8 (6.4); 189.9 (0.7); 190.8 (60.7);	Jacques et al (2015) Nat Chem Biol 11, 721-727	y=-12.64+715.98x
cFD	263	203 (2.8); 245 (100);	Chemical synthesis
	245	91.3 (1.7); 130 (28.2); 146 (0.9); 147 (1.7); 157 (7.5); 157.9 (2.4); 175 (14.1); 189 (4.3); 202.9 (100); 217 (0.5);
cFE	277	120.2 (1.4); 186 (0.5); 231.1 (19.8); 259 (100); 261.4 (0.5);	Jacques et al (2015) Nat Chem Biol 11, 721-727
	259	84.3 (0.7); 103.1 (1.3); 120.1 (27.6); 186 (10.8); 203 (2.4); 231 (100);
cFF	295	93.1 (1.1); 103 (3.4); 119.9 (100); 221.9 (2.8); 231.9 (0.8); 249.9 (4.7); 266.9 (76.6)	Bachem- G1765	y=4+1299.5x
cFG	205	103.1 (0.6); 120 (84.6); 130.9 (3); 131.9 (14.4); 147.9 (1.8); 148.9 (1); 158.9 (1.1); 159.9 (9.5); 176.9 (100); 187.8 (1.1);	Bachem - G1715	y=31.13+1057x (y between 0 and 3000)
cFH	285	83.4 (3.6); 93.2 (7.1); 110.1 (87.9); 120.1 (11.5); 130 (3.6); 138 (8.8); 165.9 (36.1); 175 (3.2); 212 (100); 224 (6.5); 239.1 (1.6); 240 (22); 257.1 (58.7); 267.1 (2.5); 268 (95.6);	Bachem - G1740	y=5.60+1066.22x
cFI	261	86.3 (38.9); 103.1 (2); 114 (1.4); 120 (100); 164.9 (0.6); 187.9 (12.1); 197.9 (1.2); 215.9 (17); 232.9 (92); 243.9 (0.5);	Chemical synthesis
	233	69.5 (1.7); 86.3 (49.2); 93.2 (1.1); 114 (8.3); 119.9 (100); 129.7 (0.6); 148 (1.2); 164.9 (4); 187.9 (51.6); 205 (1.6);
cFK	276	84.3 (2.2); 129 (4.8); 202.9 (1); 231 (3.8); 259 (100)	Chemical synthesis
	259	84.3 (23.5); 85.3 (2.1); 91.2 (12.5); 103.1 (2); 112.1 (18); 120.1 (37.9); 130 (46); 147 (2.8); 157 (12.3); 157.9 (3.8); 174.9 (17.2); 186 (13.7); 202.9 (20.6); 214 (7.6); 231 (100)
cFL	261	86.2 (20.5); 103 (1.8); 119.9 (100); 187.9 (4.2); 204.8 (0.7); 215.9 (21.4); 232.9 (65.2);	Bachem - G4385	y=0.53+772.90x
cFM	279	202.9 (0.7); 230.8 (100);	Gondry et al (2009) Nat Chem Biol 5, 414-420	y=-14.93+691.21x
	231	91.1 (11.6); 112.9 (2.4); 119.9 (2.8); 129.9 (33.2); 130.8 (2.5); 146.8 (5); 155.8 (2.8); 156.8 (5.8); 157.8 (12.5); 174.8 (33.5); 185.8 (42.3); 202.8 (100);
cFN	262	245 (100);	Jacques et al (2015) Nat Chem Biol 11, 721-727
	245	91.2 (0.5); 130 (27.4); 146.1 (0.9); 157.1 (8.5); 157.9 (2.1); 171.9 (1); 175 (8.2); 189 (7.5); 202.9 (100); 216.9 (0.5);
cFP	245	70.5 (35.4); 103.1 (0.8); 120.1 (100); 131 (2.7); 172 (3.4); 189 (1.4); 199.9 (1.8); 217 (39.1);	Bachem - G4720
cFQ	276	120.2 (0.6); 231.1 (3.8); 259 (100);	Chemical synthesis
	259	84.3 (1.1); 103.2 (1.1); 120.1 (36.3); 148 (1); 186 (12.8); 203 (3.5); 213 (3.1); 213.9 (1.4); 231 (100); 241 (5);
cFR	304	138.1 (1); 216.1(7.5); 217.1 (10.7); 244.1 (29.3); 245.1 (98); 259.1 (5); 270.1 (2.5); 287.1 (100)	Chemical synthesis
	287	110.2 (11.8); 138.1 (58.9); 152.9 (17.6); 216.1 (32); 244.1 (100); 245.1 (35.3); 270 (23.5);
	245	98.3 (11.1); 120.0 (3.5); 172.1 (5.6); 200.0 (5.1); 216.0 (36.5); 217.0 (100)
cFS	235	87.3 (7.9); 120.0 (26); 144.0 (2.2); 162.0 (12.0); 171.9 (2.2), 189.0 (18.9 ); 189.9 (1.2); 206.9 (100) ; 216.9 (8.0)	Sigma - C5254	y=-1.80+572.89x
		120 (100); 144 (15); 147 (6); 162 (26); 207 (11); 235 (14)	Stark & Hohman (2005) J. Agric. Food Chem. 53, 7222–7231
cFT	249	91.3 (18.4); 120.1 (2.7); 125.1 (1.4); 130 (1.1); 146 (6.3); 158 (17.9); 160 (9.5); 175 (23.9); 175.9 (1); 186 (4.9); 186.9 (0.9); 203 (52.2); 205 (9.2); 221 (5.1); 231 (100);	Jacques et al (2015) Nat Chem Biol 11, 721-727	y=29.60+642.89x
cFV	247	72.5 (3.6); 100.2 (0.8); 103.2 (1); 120.1 (100); 174 (10.2); 184 (0.8); 202 (9.5); 219 (62.9);	Jacques et al (2015) Nat Chem Biol 11, 721-727	y=-0.40+1233.33x
cFW	334	116.9 (3); 119.9 (8.1); 129.8 (100); 131.8 (37.9); 169.8 (9.2); 202.8 (2.8); 288.9 (3.8); 317 (9.3)	Bachem - G1775	y=-70.62+3320.26x
cFY	311	91.1 (2.2); 106.9 (1.7); 118.9 (2.2); 119.9 (18.2); 135.8 (42); 146.8 (1.1); 204.8 (10.4); 237.9 (3.5); 265.9 (5); 282.9 (100);	Gondry et al (2009) Nat Chem Biol 5, 414-420	y=4.92+1277.45x

## Sheet: cGX - 14
Compound	m/z	Fragment ions (%)	Reference	calibration curve (y: area UV214; x: species amount in nmol)
cGA	129	55.5 (0.8); 56.5 (1.4); 72.5 (7.6); 73.5 (9.2); 83.4 (0.9); 84.3 (31.9); 100.1 (0.9); 101.2 (100); 111.2 (0.9); 112.1 (11.1);	Bachem - G1660
cGC	161	69.3 (5.4); 76.3 (2.4); 88.1 (3.9); 115 (9.5); 115.9 (57.5); 132.9 (35.4); 142.6 (2.4); 143.7 (100);	This study
cGE	187	113 (0.7); 168.8 (100);	Bachem - G4290	y=30.71+389.29x (y between 0 and 7000)
	169	84.2 (100); 96.1 (14.3); 113 (98.2); 123.9 (4.8); 140.9 (97.9); 150.9 (2.6);
cGF	205	103.1 (0.6); 120 (84.6); 130.9 (3); 131.9 (14.4); 147.9 (1.8); 148.9 (1); 158.9 (1.1); 159.9 (9.5); 176.9 (100); 187.8 (1.1);	Bachem - G1715	y=31.13+1057x (y between 0 and 3000)
cGG	115	57.5 (1.2); 59.5 (75.1); 70.5 (5.4); 87.3 (100); 97.1 (2); 98.2 (3.3);	Bachem - G1965
cGH	195	82.3 (1); 95.2 (2.5); 110.1 (12.7); 122 (60.3); 134 (2.2); 138 (1.3); 149.9 (88.4); 165.9 (8.4); 166.9 (70.2); 177.9 (100)	Bachem - G1705
cGL	171	59.5 (1.4); 69.4 (1.7); 70.4 (1.4); 75.4 (3.7); 86.3 (34.3); 87.3 (21.4); 97.2 (5.2); 98.2 (11.7); 108.1 (1.3); 112.1 (1.2); 114.1 (9.5); 115 (39.7); 126 (100); 143 (30.3); 153 (1.5); 153.9 (5.3);	Aldrich - CDS007198
cGM	189	140.9 (100)	Jacques et al (2015) Nat Chem Biol 11, 721-727
	141	85.3 ( 22.9); 113.1 (100 )
cGN	172	154.9 (100);	Bachem - G3945
	155	56.4 (1.7); 85.3 (47.9); 99.1 (20.2); 113 (100); 126.9 (51);
cGP	155	70 (100); 82 (55); 99 (20); 127 (25)	Sigma - C-7280 Furtafo et al (2007) J Mass Spect 42:1279-1286
cGQ	186	155.9 (1.6); 168.9 (100)	Bachem - G3945
	169	84.2 (100); 96.1 (14.9); 113.1 (79.7); 124 (4.2); 140.9 (87.8); 151 (1.5)
cGS	145	60.5 (15); 69.4 (7.3); 71.5 (6.9); 72.4 (100); 89.2 (24.6); 99.1 (95.8); 117 (1.5)	Bachem - G1725
cGV	157	55.4 (4.6); 69.4 (2.2); 72.4 (87.1); 73.3 (4.1); 75.4 (5.5); 83.3 (20.3); 84.3 (33.4); 100.1 (14.2); 101.1 (28.8); 112.1 (100); 128 (2); 129 (64.1); 139.9 (11.1);	Jacques et al (2015) Nat Chem Biol 11, 721-727 Aldrich - # 448362
cGW	244	75.3 (0.2); 91 (0.4); 102.9 (1); 129.9 (100); 131.9 (7.1); 144.7 (0.4); 169.9 (4.1); 186.8 (0.9); 197.8 (0.3); 198.7 (0.3); 215.9 (0.2); 220.7 (1); 225.9 (0.7); 226.9 (1);	Bachem - G1730 Seguin et al. (2009) Chem Biol 18, 1362-1368	y=22.60+1888.44x

## Sheet: cHX 5 cRX 2 cKX 1 
Compound	m/z	Fragment ions (%)	Reference	calibration curve (y: area UV214; x: species amount in nmol)
Histidinyl-cyclodipeptides
cHE	267	110 (11,1); 165,8 (4); 175,8 (5,4); 203,8 (11,5); 220,9 (44,3); 230,9 (0,9); 231,9 (0,7); 248,9 (100);	This study
	249	93,1 (1); 110 (25,8); 137,9 (0,6); 164,7 (0,6); 165,8 (5,6); 175,8 (28,2); 202,9 (2,2); 203,8 (28,8); 220,8 (100); 230,8 (5,3);
cHF	285	83.4 (3.6); 93.2 (7.1); 110.1 (87.9); 120.1 (11.5); 130 (3.6); 138 (8.8); 165.9 (36.1); 175 (3.2); 212 (100); 224 (6.5); 239.1 (1.6); 240 (22); 257.1 (58.7); 267.1 (2.5); 268 (95.6);	Bachem - G1740	y=5.60+1066.22x
cHG	195	82.3 (1); 95.2 (2.5); 110.1 (12.7); 122 (60.3); 134 (2.2); 138 (1.3); 149.9 (88.4); 165.9 (8.4); 166.9 (70.2); 177.9 (100)	Bachem - G1705
cHP	235	70.4 (10.1); 93.1 (3); 109.9 (100); 137.9 (13.9); 161.9 (75.2); 165.8 (73.3); 189.8 (13.8); 206.9 (18); 216.9 (11.3); 217.8 (3.3);	Bachem - G1745	y=40.19+829.21x
cHW	324	110.2 (22.6); 122.1 (9.2); 150.1 (8.4); 159 (30.2); 165 (9.6); 166 (12.7); 167 (11.7); 169 (3.7); 170 (5.7); 178 (14.1); 193 (4.1); 195 (100); 207 (3.6); 224.1 (43); 251.1 (6.5); 263.1 (4); 279.1 (14.9); 296.1 (23.3); 306.2 (5.7); 307.1 (52.4)	NeoMPS	y=15.80+1399.11x
	195	110.2 (12.7); 122.1 (42); 138.1 (1.9); 150 (100); 165.1 (2.1); 166 (9.1); 167 (77.2); 178 (99)
Arginyl-cyclodipeptides
cRF	304	138.1 (1); 216.1(7.5); 217.1 (10.7); 244.1 (29.3); 245.1 (98); 259.1 (5); 270.1 (2.5); 287.1 (100)	Chemical synthesis
	287	110.2 (11.8); 138.1 (58.9); 152.9 (17.6); 216.1 (32); 244.1 (100); 245.1 (35.3); 270 (23.5);
	245	98.3 (11.1); 120.0 (3.5); 172.1 (5.6); 200.0 (5.1); 216.0 (36.5); 217.0 (100)
cRP	254	98.1 (0.8); 125 (1.2); 165.9 (3.3); 166.9 (1.4); 193.9 (57.4); 194.9 (100); 208.9 (1.3); 211.9 (1.7); 219.9 (2.6); 236.9 (26.3);	Vergne et al (2006) Org. Lett. 8, 2421–2424	y=-6.89+91.61x (y between 0 and 4000)
	195	70.4 (24.9); 97.1 (21.6); 98.1 (53.2); 122 (2); 124.9 (32.5); 148.9 (1.3); 152.9 (1.2); 165.9 (62.2); 166.9 (100);
Lysinyl-cyclodipeptide
cFK	276	84.3 (2.2); 129 (4.8); 202.9 (1); 231 (3.8); 259 (100)	Chemical synthesis
	259	84.3 (23.5); 85.3 (2.1); 91.2 (12.5); 103.1 (2); 112.1 (18); 120.1 (37.9); 130 (46); 147 (2.8); 157 (12.3); 157.9 (3.8); 174.9 (17.2); 186 (13.7); 202.9 (20.6); 214 (7.6); 231 (100)

## Sheet: cIX - 8
Compound	m/z	Fragment ions (%)	Reference	calibration curve (y: area UV214; x: species amount in nmol)
cIA	185	69.4 (1.5); 86.2 (100); 89.2 (0.7); 112.1 (6.4); 113.9 (1.2); 128.9 (0.9); 139.9 (35.4); 156.9 (41.3);	Xing et al (2008) Rapid Commun. Mass Spectrom. 22, 1415–1422 Stark & Hohman (2005) J. Agric. Food Chem. 53, 7222–7231 This study
cIF	261	86.3 (38.9); 103.1 (2); 114 (1.4); 120 (100); 164.9 (0.6); 187.9 (12.1); 197.9 (1.2); 215.9 (17); 232.9 (92); 243.9 (0.5);	Chemical synthesis
	233	69.5 (1.7); 86.3 (49.2); 93.2 (1.1); 114 (8.3); 119.9 (100); 129.7 (0.6); 148 (1.2); 164.9 (4); 187.9 (51.6); 205 (1.6);
cII	227	69.5 (1.3); 86.3 (45.4); 98.1 (0.8); 114 (0.8); 125.9 (0.4); 131 (0.5); 154 (27.2); ; 181.9 (45.9); 198.9 (100);	Gondry et al (2006) Patent PCT/IB2006/001849 ; WO/2007/122446
cIL	227	69.5 (1.5); 86.2 (83.9); 98.1 (4.6); 114 (3.5); 125.9 (1.4); 131 (1.2); 153.9 (22.1); 170.9 (2.6); 181.9 (100); 198.9 (76.9);	Jacques et al (2015) Nat Chem Biol 11, 721-727 Gondry et al (2006) Patent PCT/IB2006/001849 ; WO/2007/122446 Xing et al (2008) Rapid Commun Mass spectro 22: 1415-1422
cIM	245	168.9 (0.4); 196.9 (100);	Xing et al (2008) Rapid Commun. Mass Spectrom. 22, 1415–1422. This study
	197	69.3 (0.9); 73.3 (1.9); 84.2 (6); 85.2 (3.3); 96.1 (5.3); 97.1 (4.5); 98.2 (0.9); 99 (1.4); 101.1 (25); 109 (1.8); 113 (6); 121.9 (1.7); 123.9 (6.3); 126.9 (2.6); 140.9 (30.7); 150 (1.2); 151.9 (16); 168.9 (100);
cIP	211	69.4 (3.2); 70.4 (17.1); 86.2 (64.2); 98.1 (2); 112.9 (1.5); 113.9 (1.3); 137.9 (33.8); 153.9 (1.3); 154.9 (33); 165.9 (3.7); 182.9 (100); 193.9 (7.9);	Xing et al (2008) Rapid Commun Mass spectro 22: 1415-1422
cIW	300	86,3 (0,6); 117 (0,9); 117,9 (1,1); 127,9 (0,4); 129,9 (100); 131,9 (20,6); 169,8 (4,1); 237,8 (0,7); 253,5 (0,6); 254,9 (2,8); 272 (2,1); 282,9 (2,6);	Xing et al (2008) Rapid Commun. Mass Spectrom. 22, 1415–1422. This study
cIY	277	69 (4); 86 (34); 107 (18); 114 (3); 119 (4); 136 (100); 147 (3); 171 (16); 204 (38); 232 (10); 249 (44)	Xing et al (2008) Rapid Commun. Mass Spectrom. 22, 1415–1422.

## Sheet: cLX - 14
Compound	m/z	Fragment ions (%)	Reference	calibration curve (y: area UV214; x: species amount in nmol)
cLA	185	84.4 (0.9); 86.4 (53.7); 101.2 (5.1); 112.2 (6.1); 114.1 (1.7); 129.1 (6); 140 (100); 157.1 (24.2);	Sigma - C9038	y=-3.04+182.25x
cLC	217	86.3 (11.1); 101.1 (2.5); 104.1 (2.7); 116 (2.8); 121 (2.4); 125 (2.7); 144 (22.5); 153 (74.9); 171.9 (92.8); 188.9 (100); 198.9 (2.3); 199.9 (2.2)	Jacques et al (2015) Nat Chem Biol 11, 721-727
cLE	243	86.3 (0.6); 129 (1.5); 141 (1.1); 197 (12.8); 224.9 (100);	Jacques et al (2015) Nat Chem Biol 11, 721-727
	225	84.3 (5.6); 86.3 (13); 113.1 (5.9); 129 (29.1); 140.9 (27.8); 152 (0.5); 196.9 (100);
cLF	261	86.2 (20.5); 103 (1.8); 119.9 (100); 187.9 (4.2); 204.8 (0.7); 215.9 (21.4); 232.9 (65.2);	Bachem - G4385	y=0.53+772.90x
cLG	171	59.5 (1.4); 69.4 (1.7); 70.4 (1.4); 75.4 (3.7); 86.3 (34.3); 87.3 (21.4); 97.2 (5.2); 98.2 (11.7); 108.1 (1.3); 112.1 (1.2); 114.1 (9.5); 115 (39.7); 126 (100); 143 (30.3); 153 (1.5); 153.9 (5.3);	Aldrich - CDS007198
cLI	227	69.5 (1.5); 86.2 (83.9); 98.1 (4.6); 114 (3.5); 125.9 (1.4); 131 (1.2); 153.9 (22.1); 170.9 (2.6); 181.9 (100); 198.9 (76.9);	Jacques et al (2015) Nat Chem Biol 11, 721-727 Gondry et al (2006) Patent PCT/IB2006/001849 ; WO/2007/122446 Xing et al (2008) Rapid Commun Mass spectro 22: 1415-1422
cLL	227	86.2 (46.4); 98.1 (2.7); 114 (0.9); 115 (0.3); 125.9 (0.5); 142.9 (1.6); 153.9 (6.1); 170.9 (3.7); 181.9 (100); 198.9 (29.4);	NeoMPS Gondry et al (2009) Nat Chem Biol 5, 414-420	y=3.97+208.16x
cLM	245	169 (0.6); 196.9 (100);	Gondry et al (2009) Nat Chem Biol 5, 414-420	y=-1.59+645.58x
	197	84.3 (2); 85.3 (7.6); 86.3 (1.2); 101.2 (2.2); 113.1 (22.7); 124 (2.4); 140.1 (1.5); 141 (26.7); 152 (15.8); 168.9 (100);
cLP	211	70.4 (100); 72.3 (2.9); 86.3 (92.6); 110 (3.8); 113.9 (7.7); 126.9 (13.2); 138 (41.9); 154.9 (25.4); 165.9 (8); 166.9 (6.8); 182.9 (84.2); 193.9 (32.3);	Bachem - G1750 Xing et al (2008) Rapid Commun Mass spectro 22: 1415-1422	y=368.20+5133.40x (y between 400 and 8000)
cLQ	242	197 (2.2); 224.9(100)	Jacques et al (2015) Nat Chem Biol 11, 721-727
	225	84.3 (6.1); 86.3 (17.7); 113.1 (6.9); 114 (1.2); 129 (28); 141 (27); 196.9 (100); 206.9 (3)
cLT	215	86.3 (3.1); 101.2 (1.4); 113.1 (6.3); 126.1 (6.8); 141 (37); 143 (2.1); 152 (2.9); 153 (4.2); 169 (98.1); 171 (2.6); 187 (15.5); 196.9 (100)	Jacques et al (2015) Nat Chem Biol 11, 721-727
cLV	213	72.4 (34.1); 84.3 (4.6); 86.3 (35.8); 112 (0.9); 114 (1.2); 129 (1.6); 140 (32.8); 156.9 (2); 167.9 (100); 184.9 (86);	Bachem - G4725	y=106.19+533.85x (y between 0 and 7000)
cLW	300	86.2 (0.8); 116.9 (0.9); 117.9 (1); 129.8 (100); 131.9 (25.5); 168.8 (0.9); 169.8 (4.8); 254.9 (1.8); 272 (0.8); 282.9 (3.4);	Bachem - G4505	y= -46.63+2523x
cLY	277	86.2 (10.5); 91.1 (4.3); 107 (4.1); 118.9 (3.5); 135.8 (100); 146.8 (2.2); 170.8 (9.5); 203.9 (3.9); 220.9 (1.5); 231.9 (11.4); 248.9 (94); 259.9 (0.8);	Gondry et al (2009) Nat Chem Biol 5, 414-420	y=5.90+1020.2x

## Sheet: cMX - 11
Compound	m/z	Fragment ions (%)	Reference	calibration curve (y: area UV214; x: species amount in nmol)
cMA	203	126.9 (0.9); 154.8 (100);	Jacques et al (2015) Nat Chem Biol 11, 721-727
	155	71.3 (0.4); 74.4 (0.3); 82.2 (0.9); 84.2 (2.4); 86.3 (0.6); 97 (1.3); 99.1 (20.8); 109 (1); 110 (7.5); 126.9 (100);
cME	261	104.1 (0.8); 123.9 (0.4); 167 (83); 195 (23.6); 213 (76.6); 215 (81.8); 241.6 (0.8); 243 (100);	Jacques et al (2015) Nat Chem Biol 11, 721-727
	243	104.1 (1.8); 166.9 (100); 186.9 (0.5); 194.9 (32.7); 213.2 (0.9); 214.9 (53.6)
cMF	279	202.9 (0.7); 230.8 (100);	Gondry et al (2009) Nat Chem Biol 5, 414-420	y=-14.93+691.21x
	231	91.1 (11.6); 112.9 (2.4); 119.9 (2.8); 129.9 (33.2); 130.8 (2.5); 146.8 (5); 155.8 (2.8); 156.8 (5.8); 157.8 (12.5); 174.8 (33.5); 185.8 (42.3); 202.8 (100);
cMG	189	140.9 (100)	Jacques et al (2015) Nat Chem Biol 11, 721-727
	141	85.3 ( 22.9); 113.1 (100 )
cMI	245	168.9 (0.4); 196.9 (100);	Xing et al (2008) Rapid Commun. Mass Spectrom. 22, 1415–1422. This study
	197	69.3 (0.9); 73.3 (1.9); 84.2 (6); 85.2 (3.3); 96.1 (5.3); 97.1 (4.5); 98.2 (0.9); 99 (1.4); 101.1 (25); 109 (1.8); 113 (6); 121.9 (1.7); 123.9 (6.3); 126.9 (2.6); 140.9 (30.7); 150 (1.2); 151.9 (16); 168.9 (100);
cML	245	169 (0.6); 196.9 (100);	Gondry et al (2009) Nat Chem Biol 5, 414-420	y=-1.59+645.58x
	197	84.3 (2); 85.3 (7.6); 86.3 (1.2); 101.2 (2.2); 113.1 (22.7); 124 (2.4); 140.1 (1.5); 141 (26.7); 152 (15.8); 168.9 (100);
cMM	263	167 (8.7); 186.9 (0.4); 214.9 (100);	Bachem - G1760	y=-4.37+605.75x
	215	111 (2.4); 139 (4.6); 166.9 (100); 186.9 (0.6);
cMP	229	180.9 (100)	Bachem - G4725	y=70.19+6813.70x (y between 0 and 5200)
	181	70.4 (7); 74.4 (0.6); 80.3 (0.5); 82.3 (0.4); 84.2 (6.9); 97.2 (3.7); 98.1 (0.4); 114 (0.5); 124.9 (100); 152.9 (59.9);
cMV	231	155.0 (1); 183.0 (100);	This study
	183	69.6 (3.8); 72.5 (0.7); 82.4 (2.3); 83.3 (2.4); 95.3 (1.8); 99.3 (4.6); 101.1 (11.2); 110.1 (3.4); 127.1 (36.4); 138.1 (16.1); 155 (100);
cMW	318	129.9 (21.6 ); 186.7 (3); 270 (100)	Seguin et al. (2009) Chem Biol 18, 1362-1368
	270	101 (22.2 );112.9 (26.4 ); 131.9 (25 ); 140.8 (80.5 ); 152.8 (4 ); 169.7 (100 ); 196.8 (5 ); 224.8 (14 ); 241.8 (1 )
cMY	295	218.9 (0.2); 246.9 (100);	Gondry et al (2009) Nat Chem Biol 5, 414-420	y=1.01+820.50x
	247	84.2 (3.1); 85.2 (19.4); 106.9 (11.4); 112.9 (19.4); 135.9 (2.9); 140.8 (23.9); 145.8 (45.5); 146.8 (8); 162.8 (14.6); 172.8 (4); 173.8 (21.8); 189.9 (6.5); 190.8 (20.5); 201.8 (64.5); 218.8 (100);

## Sheet: cNX 3 cDX 1
Compound	m/z	Fragment ions (%)	Reference	calibration curve (y: area UV214; x: species amount in nmol)
cNF	262	245 (100);	Jacques et al (2015) Nat Chem Biol 11, 721-727
	245	91.2 (0.5); 130 (27.4); 146.1 (0.9); 157.1 (8.5); 157.9 (2.1); 171.9 (1); 175 (8.2); 189 (7.5); 202.9 (100); 216.9 (0.5);
cDF	263	203 (2.8); 245 (100);	Chemical synthesis
	245	91.3 (1.7); 130 (28.2); 146 (0.9); 147 (1.7); 157 (7.5); 157.9 (2.4); 175 (14.1); 189 (4.3); 202.9 (100); 217 (0.5);
cNG	172	154.9 (100);	Bachem - G3945
	155	56.4 (1.7); 85.3 (47.9); 99.1 (20.2); 113 (100); 126.9 (51);
cNW	301	283.9 (100);	This study
	284	129.9 (100); 132 (3.3); 136.8 (2.6); 154.8 (7.4); 169.8 (93.6); 186.8 (13); 194.8 (4); 196.7 (2.9); 211.9 (3.3); 220.8 (8.8); 221.9 (2.6); 222.9 (9.2); 229.8 (1.8); 238.9 (63.3); 239.8 (3.8); 241.8 (9.8); 248.8 (3.6); 255.9 (8); 265.9 (5); 266.9 (9.3);

[truncated: 5 more sheets: cPX - 13, cSX 6 cTX 4 cCX 7, cVX - 9, cWX - 15, cYX - 11]
